# Supplementary material
Source: ML conference proceedings conference paper supplement (https://openreview.net/forum?id=RJVucEoOO0)
Supplement: supplementary_material [file attachment]

# Fairness and Privacy Guarantees in Federated Contextual Bandits

## 1. Proofs

**Lemma 1** (Lemma 5 in main paper) *For the Fed-FairX-LinUCB, with high probability, the instantaneous regret for any agent  $i$  is bounded by,*

$$FR_t^i = \sum_{a \in \mathcal{D}} |\pi_t^i - \pi_*^i| \leq \frac{4L\sqrt{\beta_t}}{\gamma} \mathbb{E}_{a \sim \pi_t^i} \|x_t^i(a)\|_{(V_t^i)^{-1}}$$

Proof provided in Appendix.

### Proof

$$\begin{aligned} FR_t^i &= \sum_{a \in \mathcal{D}} \left| \frac{f^i(\theta^* x_t^i(a))}{\sum_{a' \in \mathcal{D}} f^i(\theta^* x_t^i(a'))} - \frac{f^i(\theta_t^i x_t^i(a))}{\sum_{a' \in \mathcal{D}} f^i(\theta_t^i x_t^i(a'))} \right| \\ &= \sum_a \left| \frac{f^i(\theta^* x_t^i(a)) \sum_{a'} f^i(\theta_t^i x_t^i(a')) - f^i(\theta_t^i x_t^i(a)) \sum_{a'} f^i(\theta^* x_t^i(a'))}{\sum_{a'} f^i(\theta_t^i x_t^i(a')) \sum_{a'} f^i(\theta^* x_t^i(a'))} \right| \\ &= \sum_a \frac{\left| f^i(\theta^* x_t^i(a)) \sum_{a'} (f^i(\theta_t^i x_t^i(a')) - f^i(\theta^* x_t^i(a'))) \right. \\ &\quad \left. + (f^i(\theta^* x_t^i(a)) - f^i(\theta_t^i x_t^i(a))) \sum_{a'} f^i(\theta^* x_t^i(a')) \right|}{\sum_{a'} f^i(\theta_t^i x_t^i(a')) \sum_{a'} f^i(\theta^* x_t^i(a'))} \\ &\leq \sum_a \frac{\left| f^i(\theta^* x_t^i(a)) \sum_{a'} (f^i(\theta_t^i x_t^i(a')) - f^i(\theta^* x_t^i(a'))) \right. \\ &\quad \left. + |(f^i(\theta^* x_t^i(a)) - f^i(\theta_t^i x_t^i(a))) \sum_{a'} f^i(\theta^* x_t^i(a'))| \right|}{\sum_{a'} f^i(\theta_t^i x_t^i(a')) \sum_{a'} f^i(\theta^* x_t^i(a'))} \\ &\leq \frac{2 \sum_a |f^i(\theta^* x_t^i(a)) - f^i(\theta_t^i x_t^i(a))|}{\sum_{a'} f^i(\theta_t^i x_t^i(a'))} \\ &= 2 \sum_a \frac{\pi_t^i}{f^i(\theta_t^i x_t^i(a))} \left| \frac{f^i(\theta^* x_t^i(a)) - f^i(\hat{\theta}_t^i x_t^i(a))}{f^i(\theta_t^i x_t^i(a)) - f^i(\theta_t^i x_t^i(a))} \right| \end{aligned}$$

$$\begin{aligned}
&\leq \frac{2L}{\gamma} \mathbb{E}_{a \sim \pi_t^i} \left[ \begin{aligned} &\left\| \theta^* - \hat{\theta}_t^i \right\|_{V_t^i} \left\| x_t^i(a) \right\|_{(V_t^i)^{-1}} \\ &+ \left\| \hat{\theta}_t^i - \theta_t^i \right\|_{V_t^i} \left\| x_t^i(a) \right\|_{(V_t^i)^{-1}} \end{aligned} \right] \\
&\leq \frac{4L\sqrt{\beta_t}}{\gamma} \mathbb{E}_{a \sim \pi_t^i} \left\| x_t^i(a) \right\|_{(V_t^i)^{-1}}
\end{aligned}$$

This completes the proof of Lemma 3. ■

**Theorem 2** (Theorem 6 in main text) *With high probability, Fed-FairX-LinUCB achieves a fairness regret of*

$$O\left(\frac{4\nu L\sqrt{\beta_t}}{\gamma} \sqrt{mTd \log\left(1 + \frac{T}{d}\right) + m^2 d^3 \log^3\left(1 + \frac{T}{d}\right)}\right)$$

when  $\|x_t^i(a)\|_2 \leq 1 \forall a, t, i$ .

**Proof**

Consider a hypothetical agent denoted by index 0 who plays in the following  $mT$  rounds -  $(1, 1), (1, 2), \dots, (1, m), \dots, (T, m)$  sequentially. Let the gram matrix for agent 0 till round  $(\tau, j)$  be given by  $V_{(\tau, j)}^0 = mI + \sum_{i=1}^{i=m} \sum_{t=1}^{\tau-1} (x_t^i(a_t^i))(x_t^i(a_t^i))^T + \sum_{i=1}^{i=j} (x_\tau^i(a_\tau^i))(x_\tau^i(a_\tau^i))^T$ . Substituting  $U_1 = mI$  and  $L = 1$  in Lemma 3, main text, we get,

$$\sum_{i=1}^{i=m} \sum_{t=1}^T \left\| x_t^i(a_t^i) \right\|_{(V_{(t,i)}^0)^{-1}}^2 \leq 2d \log\left(1 + \frac{T}{d}\right)$$

Let the communication in the original algorithm occur at rounds  $T_1, T_2, \dots, T_{p-1}$ . Let  $\Psi_k = mI + \sum_{i=1}^{i=m} \sum_{t=1}^{T_k} (x_t^i(a_t^i))(x_t^i(a_t^i))^T$  be the synchronised gram matrix after communication round  $k$ . Then  $\det \Psi_0 = (m)^d$  and  $\det \Psi_p \leq \left(\frac{\text{tr}(\Psi_p)}{d}\right)^d \leq (m + mT/d)^d$ . Thus, for any  $\nu > 1$ ,  $\log_\nu\left(\frac{\det(\Psi_p)}{\det(\Psi_0)}\right) \leq d \log_\nu(1 + \frac{T}{d})$ . Let event  $E$  represent the set of rounds when  $1 \leq \frac{\det(\Psi_k)}{\det(\Psi_{k-1})} \leq \nu$  is true. Then, in all but  $\lceil d \log_\nu(1 + \frac{T}{d}) \rceil$  rounds  $E$  is true.

For any  $T_{k-1} \leq t \leq T_k$ , when  $E$  is true,

$$\begin{aligned}
fr_t^i &\leq \frac{4L\sqrt{\beta_t}}{\gamma} \mathbb{E}_{a \sim \pi_t^i} \left\| x_t^i(a) \right\|_{(V_t^i)^{-1}} \\
&\leq \frac{4L\sqrt{\beta_t}}{\gamma} \mathbb{E}_{a \sim \pi_t^i} \left\| x_t^i(a) \right\|_{(V_{(t,i)}^0)^{-1}} \sqrt{\frac{\det V_{(t,i)}^0}{\det V_t^i}} \\
&\leq \frac{4L\sqrt{\beta_t}}{\gamma} \mathbb{E}_{a \sim \pi_t^i} \left\| x_t^i(a) \right\|_{(V_{(t,i)}^0)^{-1}} \sqrt{\frac{\det \Psi_k}{\det \Psi_{k-1}}} \\
&\leq \frac{4\nu L\sqrt{\beta_t}}{\gamma} \mathbb{E}_{a \sim \pi_t^i} \left\| x_t^i(a) \right\|_{(V_{(t,i)}^0)^{-1}}
\end{aligned}$$

Here, second last equation follows because  $V_t^i \succeq \Psi_{k-1}$  and  $\Psi_k \succeq V_{(t,i)}^0$ . Now, using Lemma 4, main text,

$$\begin{aligned}
\sum_{i=1}^m \sum_{t \in E} fr_t^i &\leq \sum_{i=1}^m \sum_{t \in E} \frac{4\nu L \sqrt{\beta_t}}{\gamma} \mathbb{E}_{a \sim \pi_t^i} \|x_t^i(a)\|_{(V_{(t,i)}^0)^{-1}} \\
&\leq \frac{4\nu L \sqrt{\beta_T}}{\gamma} \left( \sum_{i=1}^m \sum_{t=1}^T \|x_t^i(a_t^i)\|_{(V_{(t,i)}^0)^{-1}} + \sqrt{2mT \log(4/\delta)} \right) \\
&\leq \frac{4\nu L \sqrt{mT \beta_T}}{\gamma} \left( \sqrt{d \log(1 + \frac{T}{d})} + \sqrt{2 \log(4/\delta)} \right)
\end{aligned}$$

Now, let us consider any period  $t \in [T_{k-1}, T_k]$ , where  $E$  does not hold and  $t_k = T_k - T_{k-1}$  represent the length of the interval. Fairness regret during this period is given by,

$$\begin{aligned}
FR([T_{k-1}, T_k]) &\leq \frac{4L \sqrt{\beta_T}}{\gamma} \sum_{i=1}^m \sum_{t=T_{k-1}}^{T_k} \mathbb{E}_{a \sim \pi_t^i} \|x_t^i(a)\|_{(V_t^i)^{-1}} \\
&\leq \frac{4L \sqrt{\beta_T}}{\gamma} \left( \sum_{i=1}^m \sum_{t=T_{k-1}}^{T_k} \|x_t^i(a_t^i)\|_{(V_t^i)^{-1}} + m \sqrt{2t_k \log(4/\delta)} \right) \quad (\text{Using Lemma 4, main text}) \\
&\leq \frac{4L \sqrt{\beta_T}}{\gamma} \left( \sum_{i=1}^m \sqrt{t_k \log_\nu \frac{\det V_{T_{k-1}+t_k}^i}{\det V_{T_{k-1}}^i}} + m \sqrt{2t_k \log(4/\delta)} \right)
\end{aligned}$$

We know that  $\forall$  agents,  $t_k \leq \frac{T}{md^2 \log^2(1+T/d)} + 1$  (otherwise there be a communication round),

$$\begin{aligned}
\text{thus } FR([T_{k-1}, T_k]) &\leq \frac{4L \sqrt{\beta_T}}{\gamma} \\
&\left( \sqrt{\frac{m(T+md^2 \log^2(1+\frac{T}{d}))}{d \log(1+\frac{T}{d})}} + \sqrt{\frac{2m(T+md^2 \log^2(1+\frac{T}{d}))}{d^2 \log^2(1+\frac{T}{d})} \log(\frac{4}{\delta})} \right).
\end{aligned}$$

Using the fact that  $E$  does not hold true in at most in  $\lceil d \log_\nu(1 + \frac{T}{d}) \rceil$  rounds, we get

$$FR(T) \leq O \left( \frac{4\nu L \sqrt{\beta_T}}{\gamma} \sqrt{mT d \log(1 + T/d) + m^2 d^3 \log^3(1 + T/d)} \right)$$

■
